# Supplementary material for: Functionalized Crystalline N-Trimethyltriindoles: Counterintuitive Influence of Peripheral Substituents on Their Semiconducting Properties
Source: MDPI journal article supplement (doi:10.3390/molecules27031121), 2022-02-08
Supplement: s1 [file s1]

# Supporting Information

## Functionalized Crystalline *N*-trimethyltriindoles: Counterintuitive Influence of Substituents on their Semiconducting Properties

Sergio Gámez-Valenzuela <sup>1</sup>, Angela Benito-Hernández<sup>2</sup>, Marcelo Echeverri<sup>2</sup>, Enrique Gutierrez-Puebla<sup>2</sup>, Rocío Ponce Ortiz <sup>1</sup>, M. Carmen Ruiz Delgado <sup>1,\*</sup> and Berta Gómez-Lor <sup>2,\*</sup>

<sup>1</sup> Department of Physical Chemistry, University of Málaga, Campus de Teatinos s/n, 29071, Málaga, Spain.; carmenrd@uma.es

<sup>2</sup> Instituto de Ciencia de Materiales de Madrid-Consejo Superior de Investigaciones Científicas (ICMM-CSIC), Sor Juana Inés de la Cruz 3, Cantoblanco 28049, Madrid, Spain.; bgl@icmm.csic.es

### Table of Contents

|                                                                        | Page |
|------------------------------------------------------------------------|------|
| 1. Copy of <sup>1</sup> HNMR and <sup>13</sup> CNMR spectra of 2 and 3 | S2   |
| 2. Single crystal X-ray and refinement data of 2                       | S4   |
| 3. Powder X-ray diffractogram of 3                                     | S4   |
| 4. DFT calculations                                                    | S5   |
| 5. OFET derived electrical data                                        | S11  |
| 6. Morphologic characterization                                        | S13  |

### 1. Copy of <sup>1</sup>HNMR and <sup>13</sup>CNMR spectra of 2 and 3

$^1\text{H}$  NMR (300MHz,  $\text{CDCl}_3$ , 25°C)

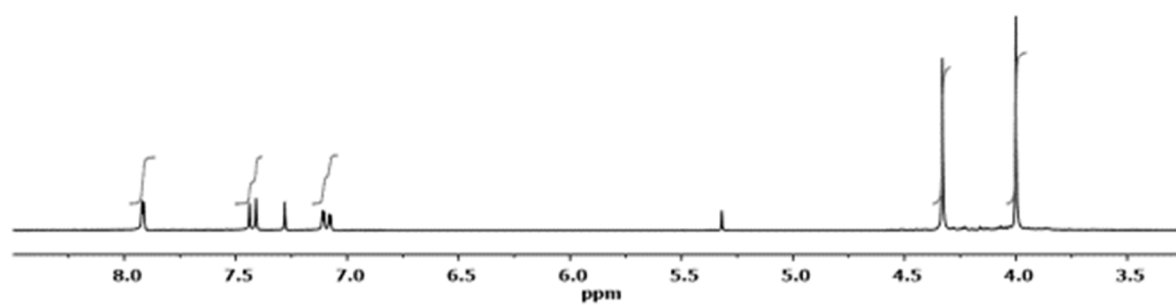

$^{13}\text{C}$  NMR (300MHz,  $\text{CDCl}_3$ , 25°C)

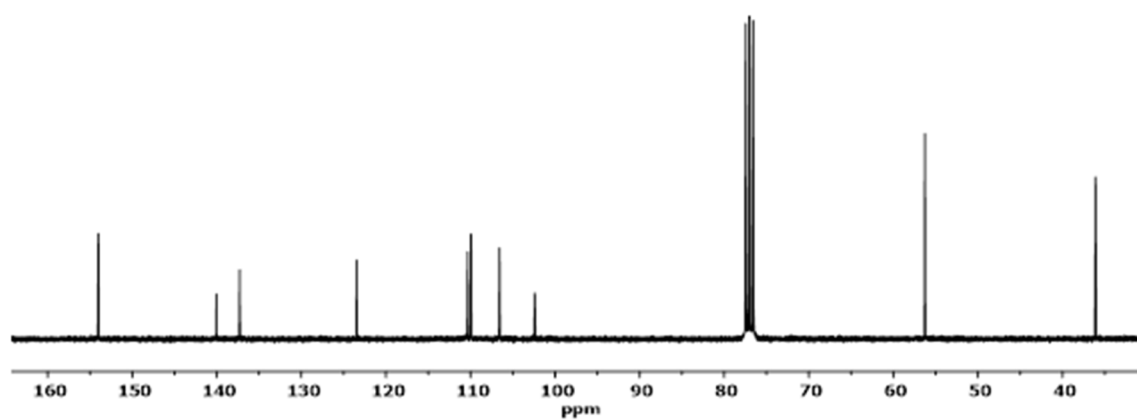

$^1\text{H}$  NMR spectrum of 3,8,13-triacetyl-5,10,15-trimethyl-10,15-dihydro-5H-diindolo[3,2- $\alpha$ :3',2'-c]carbazole (3).

$^1\text{H}$  NMR (300MHz,  $\text{C}_2\text{D}_2\text{Cl}_4$ , 100°C)

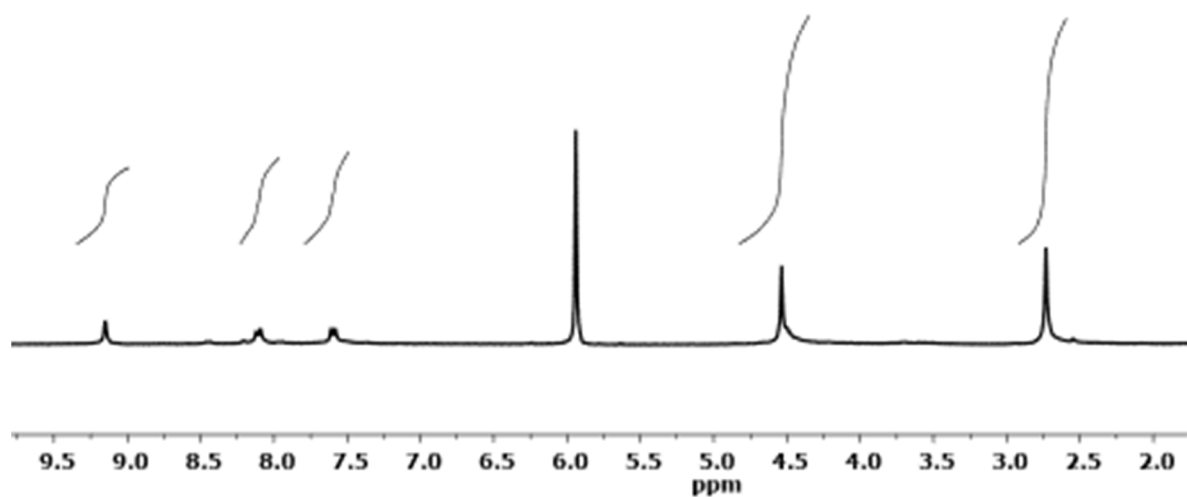

$^{13}\text{C}$  NMR (75MHz,  $\text{C}_2\text{D}_2\text{Cl}_4$ , 100°C)

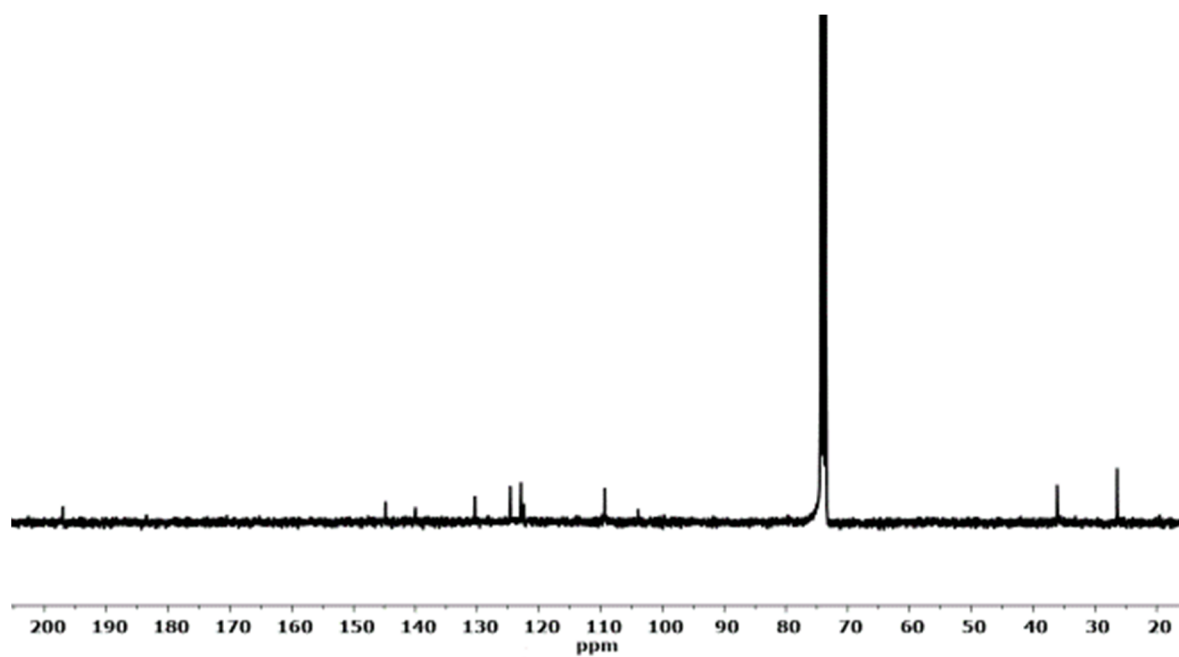

## 2. Single crystal X-ray and refinement data of 2

**Table S1.** Main crystallographic and refinement data for **2**.

|                                            |                     |
|--------------------------------------------|---------------------|
| Compound                                   | <b>2</b>            |
| Formula                                    | C30 H27 N3 O3       |
| Molecular Weight /gmol <sup>-1</sup>       | 477.55              |
| Temperature/K                              | 223(2)              |
| Wavelength/Å                               | 1.54178             |
| Crystal System                             | Monoclinic          |
| Space Group                                | <i>P</i> 63         |
| <i>a</i> /Å                                | 13.8394(9)          |
| <i>b</i> /Å                                | 13.8394(9)          |
| <i>c</i> /Å                                | 6.9759(8)           |
| $\alpha$ /°                                | 90                  |
| $\beta$ /°                                 | 90                  |
| $\gamma$ /°                                | 120                 |
| <i>Z</i>                                   | 2                   |
| <i>D</i> <sub>x</sub> / g.cm <sup>-3</sup> | 1.371               |
| $\mu$ /mm <sup>-1</sup>                    | 0.717               |
| Final                                      |                     |
| <i>R</i> indexes                           | <i>R</i> 1: 0.1036  |
| [ <i>I</i> >2σ( <i>I</i> )]                | <i>wR</i> 2: 0.3071 |

### 3. Powder X-ray diffractogram of **3**

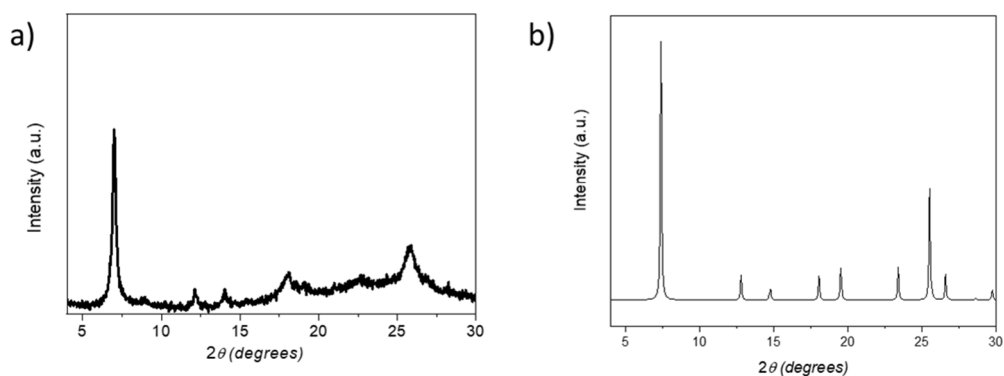

**Figure S1.** a) Experimental powder X-ray diffractogram of **3** and b) simulated X-ray diffractogram of **2** obtained from its single crystal data.

### 4. DFT Calculations

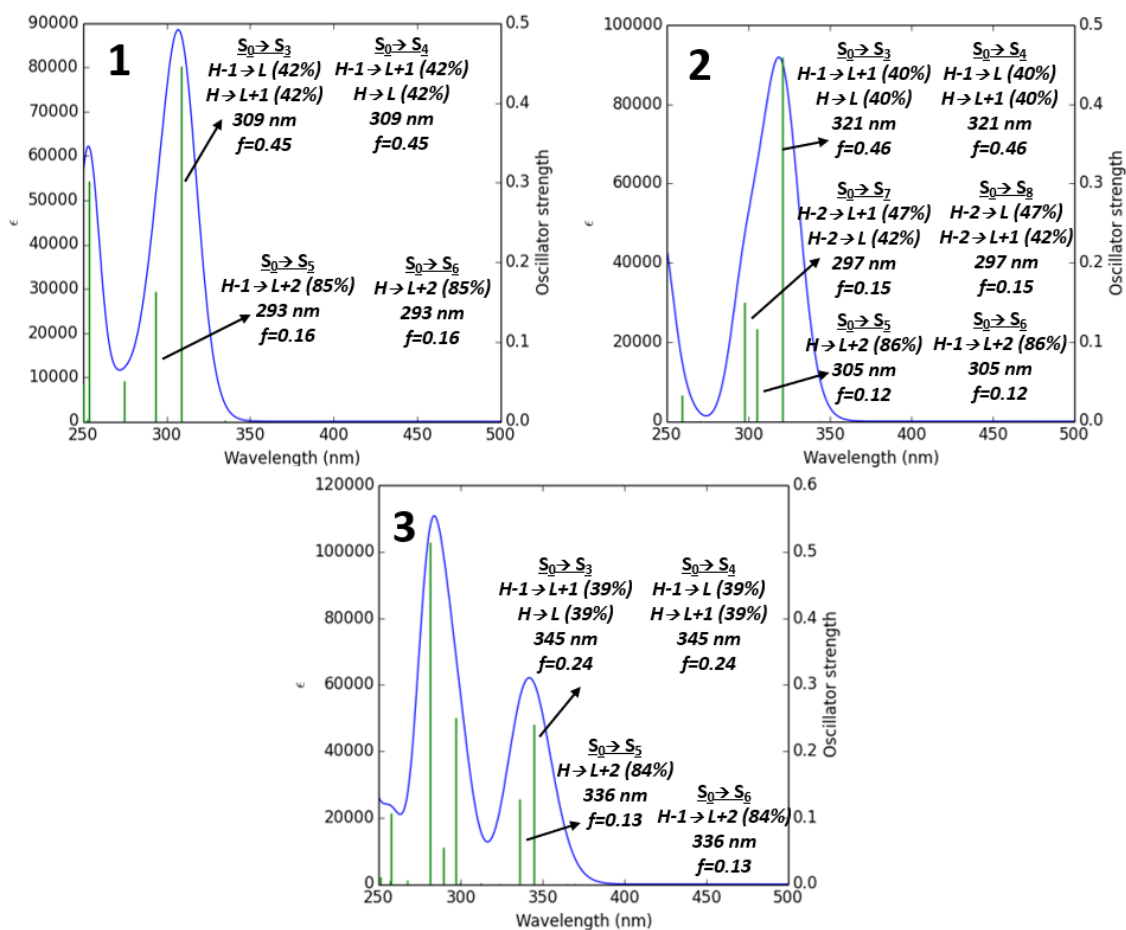

**Figure S2.** Simulated absorption spectra and main excitations (shown as vertical bars) for the compounds under study. The computations were done at the TD-DFT level by using B3LYP functional and 6-31G\*\* basis set.

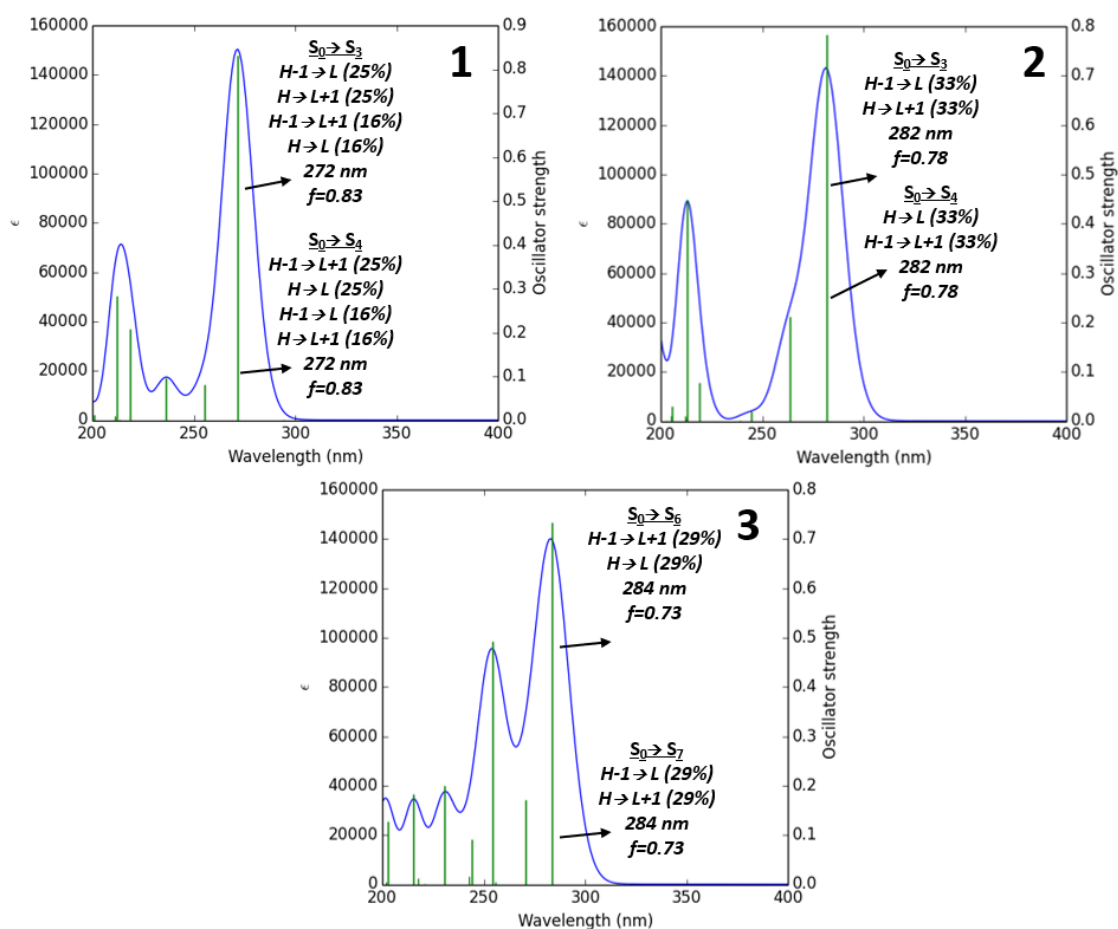

**Figure S3.** Simulated absorption spectra and main excitations (shown as vertical bars) for the compounds under study. The computations were done at the TD-DFT level by using M06-2X functional and 6-31G\*\* basis set.

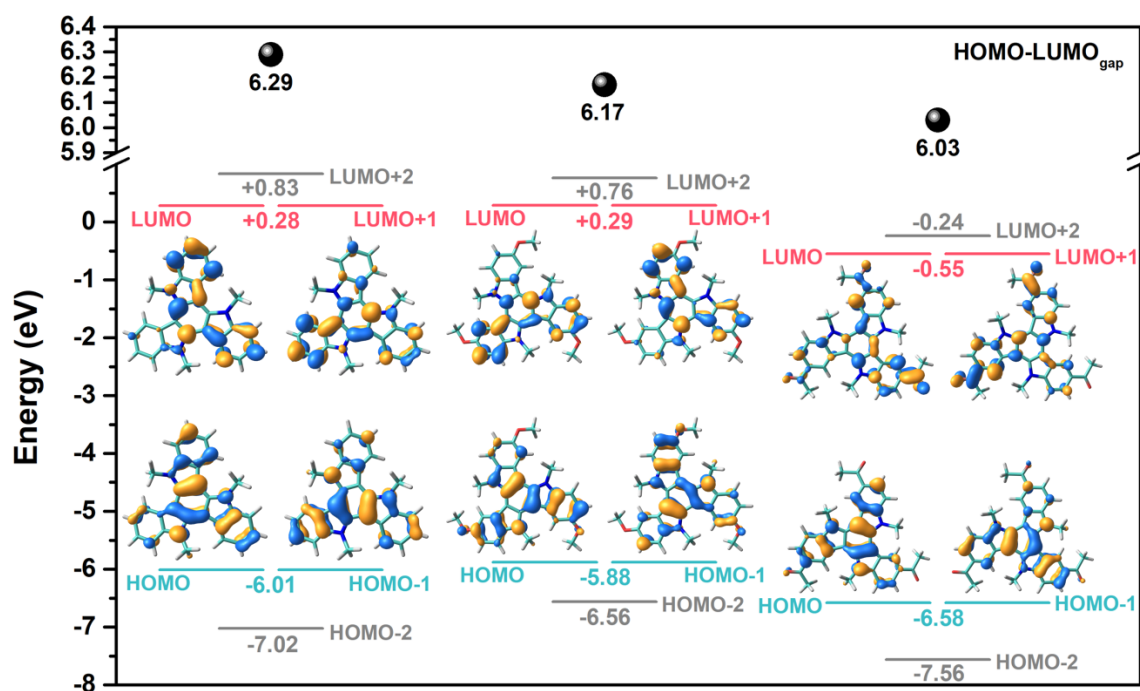

**Figure S4.** DFT-calculated FMOs energies and topologies for all the compounds under study at the M06-2X/6-31G\*\* level of theory.

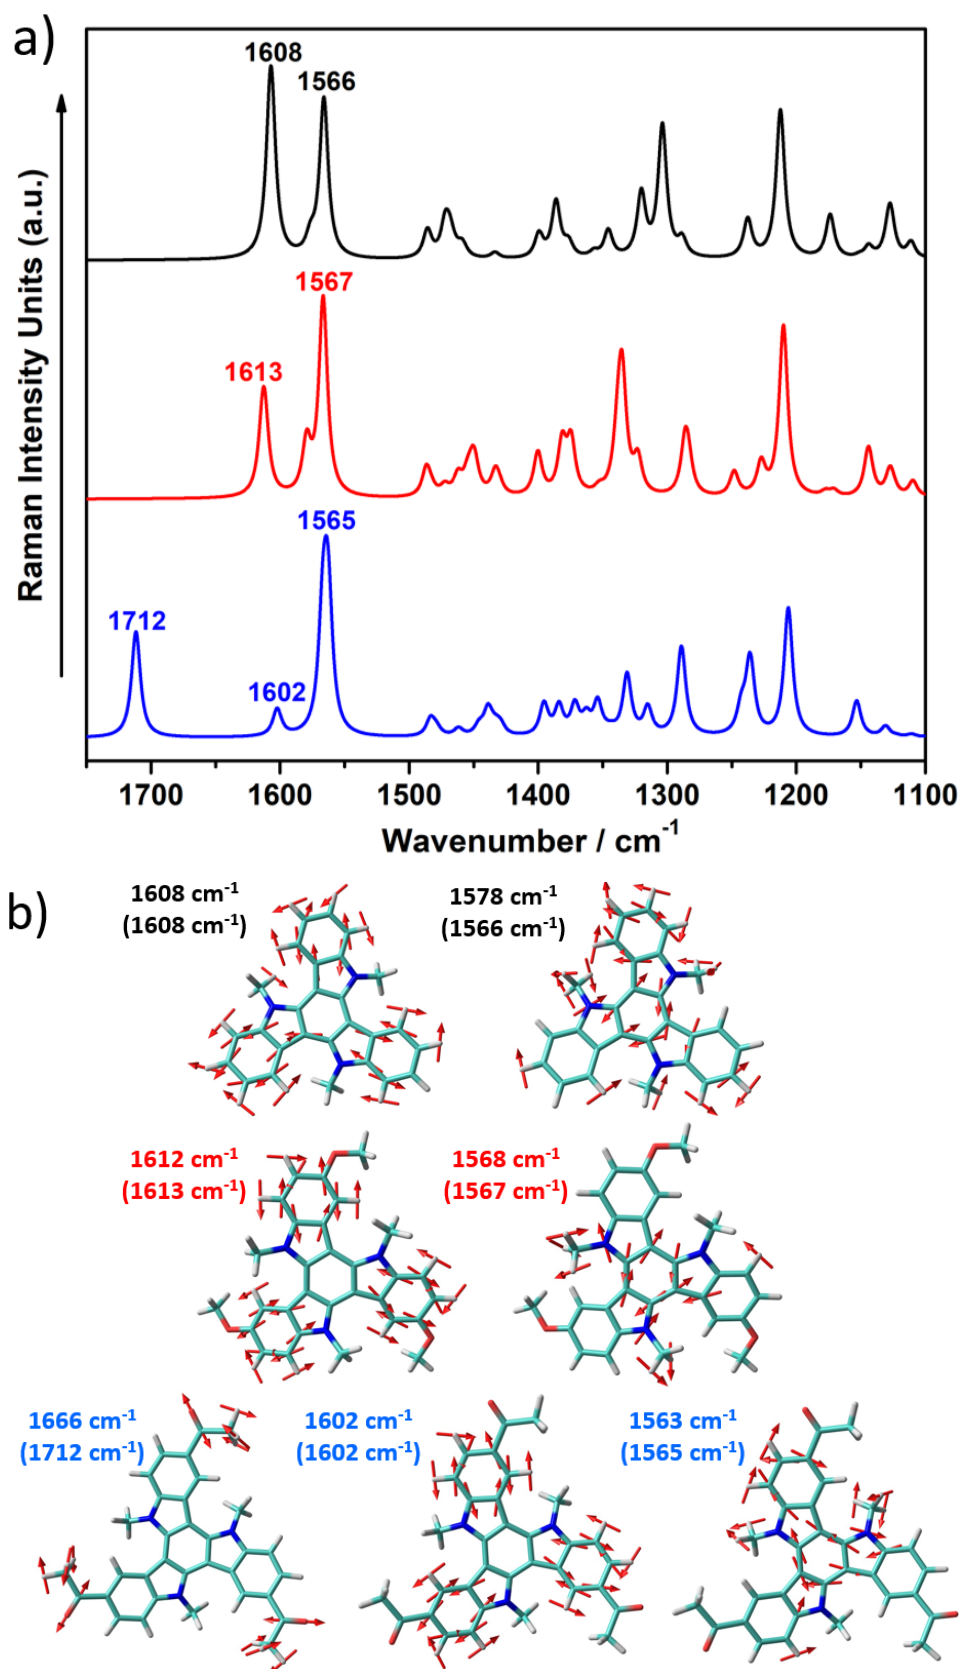

**Figure S5.** Theoretical (a) Raman spectrum and (b) vibrational eigenvectors associated with the most outstanding C=C/C-C Raman features for the previously optimized structures of **1** (top), **2** (middle) and **3** (bottom) compounds at B3LYP/6-31G\*\* level. The experimental and theoretical (in parentheses) wavenumbers are also shown.

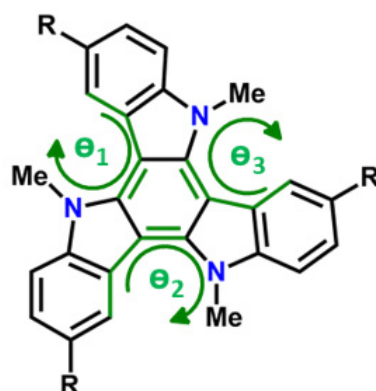

| Compound | Neutral State |            |            |
|----------|---------------|------------|------------|
|          | $\theta_1$    | $\theta_2$ | $\theta_3$ |
| 1        | 8° (8°)       | 8° (8°)    | 8° (8°)    |
| 2        | 8° (8°)       | 8° (8°)    | 8° (8°)    |
| 3        | 9° (8°)       | 7° (8°)    | 8° (8°)    |

**Figure S6.** DFT-calculated (B3LYP/6-31G\*\*) dihedral angles values along the conjugated backbone for the triindole systems under study. Values in parenthesis correspond to those calculated at the M06-2X/6-31G\*\* level.

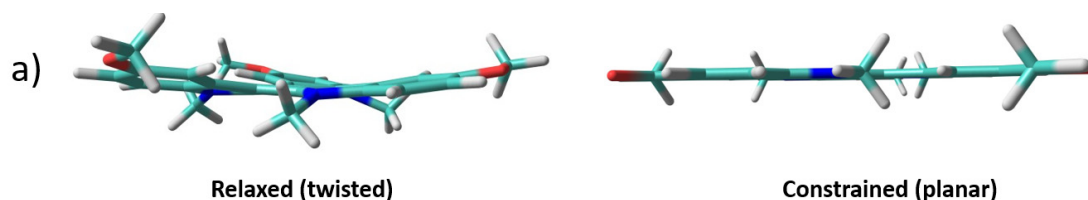

b)

|   | B3LYP/6-31G**             |                          |                       | M06-2X/6-31G**            |                          |                       |
|---|---------------------------|--------------------------|-----------------------|---------------------------|--------------------------|-----------------------|
|   | $E_{\text{TWISTED}}$ (HF) | $E_{\text{PLANAR}}$ (HF) | $\Delta E$ (Kcal/mol) | $E_{\text{TWISTED}}$ (HF) | $E_{\text{PLANAR}}$ (HF) | $\Delta E$ (Kcal/mol) |
| 1 | -1205.85420369            | -1205.84415131           | 6.3                   | -1205.36423168            | -1205.35344835           | 6.8                   |
| 2 | -1549.42151750            | -1549.41095946           | 6.6                   | -1548.79765866            | -1548.78635434           | 7.1                   |
| 3 | -1663.80909824            | -1663.79954533           | 6.0                   | -1663.13519518            | -1663.12502080           | 6.4                   |

**Figure S7.** a) Lateral view of DFT-computed global minimum structure for the fully relaxed (twisted) and constrained (planar) geometries of triindole **1** taken as an example. b) Energy differences ( $\Delta E$ ) between the fully relaxed (twisted) and constrained (planar) geometries of triindoles **1-3**.



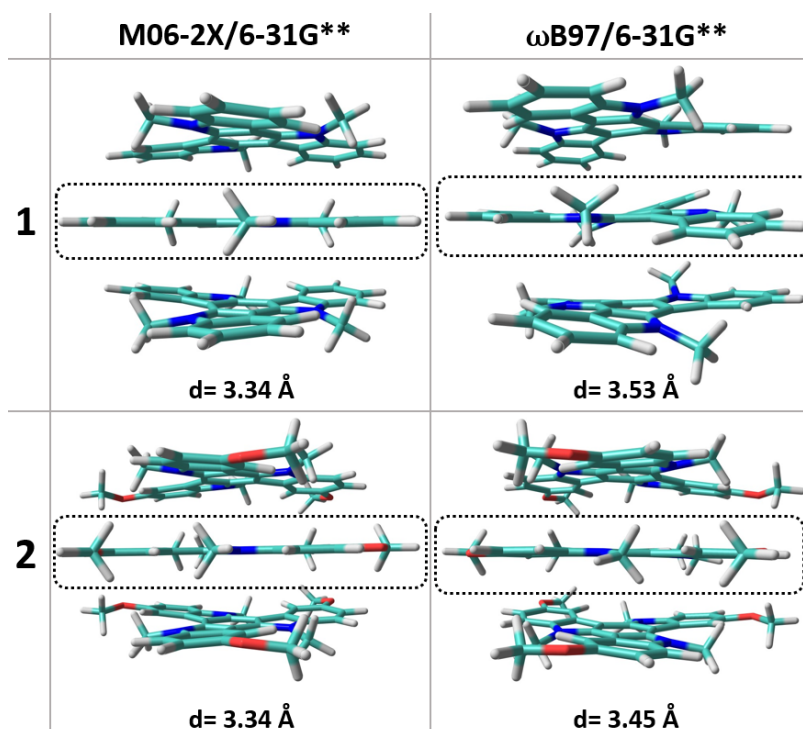

**Figure S8.** DFT-computed global minimum structures for a trimer model of **1** and **2** at the M06-2X and  $\omega$ B97X level. The average centroid-centroid distance of the central aromatic rings between adjacent molecules is also shown.

|   | Neutral State |            |            | Radical Cation |            |            | $\Delta\theta$ (Neutral-Cation states) |                  |                  |
|---|---------------|------------|------------|----------------|------------|------------|----------------------------------------|------------------|------------------|
|   | $\theta_1$    | $\theta_2$ | $\theta_3$ | $\theta_1$     | $\theta_2$ | $\theta_3$ | $\Delta\theta_1$                       | $\Delta\theta_2$ | $\Delta\theta_3$ |
| 1 | 25°           | 25°        | 25°        | 18°            | 26°        | 17°        | 7°                                     | -1°              | 7°               |
| 2 | 27°           | 27°        | 27°        | 19°            | 27°        | 19°        | 8°                                     | 0°               | 8°               |
| 3 | 24°           | 24°        | 21°        | 20°            | 23°        | 16°        | 4°                                     | 1°               | 5°               |

  

|   | Neutral State |               |               | Radical Cation |               |               | $\Delta\theta$ (Neutral-Cation states) |                  |                  |
|---|---------------|---------------|---------------|----------------|---------------|---------------|----------------------------------------|------------------|------------------|
|   | $\theta_{1'}$ | $\theta_{2'}$ | $\theta_{3'}$ | $\theta_{1'}$  | $\theta_{2'}$ | $\theta_{3'}$ | $\Delta\theta_1$                       | $\Delta\theta_2$ | $\Delta\theta_3$ |
| 1 | 6°            | 6°            | 6°            | 6°             | 12°           | 3°            | 0°                                     | -6°              | 3°               |
| 2 | 6°            | 6°            | 6°            | 7°             | 11°           | 3°            | -1°                                    | -5°              | 3°               |
| 3 | 6°            | 7°            | 6°            | 8°             | 10°           | 2°            | -2°                                    | -3°              | 4°               |

**Figure S9.** DFT-calculated dihedral angles values along the conjugated backbone for the triindole systems under study on their neutral and radical cation states at the B3LYP/6-31G\*\* level.

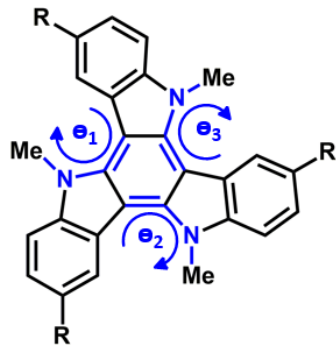


|   | Neutral State |            |            | Radical Cation |            |            | $\Delta\theta$ (Neutral-Cation states) |                  |                  |
|---|---------------|------------|------------|----------------|------------|------------|----------------------------------------|------------------|------------------|
|   | $\theta_1$    | $\theta_2$ | $\theta_3$ | $\theta_1$     | $\theta_2$ | $\theta_3$ | $\Delta\theta_1$                       | $\Delta\theta_2$ | $\Delta\theta_3$ |
| 1 | 25°           | 25°        | 25°        | 15°            | 25°        | 19°        | 10°                                    | 0°               | 6°               |
| 2 | 26°           | 26°        | 26°        | 17°            | 26°        | 18°        | 9°                                     | 0°               | 8°               |
| 3 | 24°           | 24°        | 24°        | 15°            | 25°        | 19°        | 9°                                     | -1°              | 5°               |

  

|   | Neutral State |             |             | Radical Cation |             |             | $\Delta\theta$ (Neutral-Cation states) |                  |                  |
|---|---------------|-------------|-------------|----------------|-------------|-------------|----------------------------------------|------------------|------------------|
|   | $\theta_1'$   | $\theta_2'$ | $\theta_3'$ | $\theta_1'$    | $\theta_2'$ | $\theta_3'$ | $\Delta\theta_1$                       | $\Delta\theta_2$ | $\Delta\theta_3$ |
| 1 | 6°            | 6°          | 6°          | 7°             | 1°          | 11°         | -1°                                    | 5°               | -5°              |
| 2 | 6°            | 6°          | 6°          | 7°             | 1°          | 12°         | -1°                                    | 5°               | -6°              |
| 3 | 6°            | 6°          | 6°          | 7°             | 1°          | 10°         | -1°                                    | 5°               | -4°              |

**Figure S10.** DFT-calculated dihedral angles values along the conjugated backbone for the triindole systems under study on their neutral and radical cation states at the M06-2X/6-31G\*\* level.

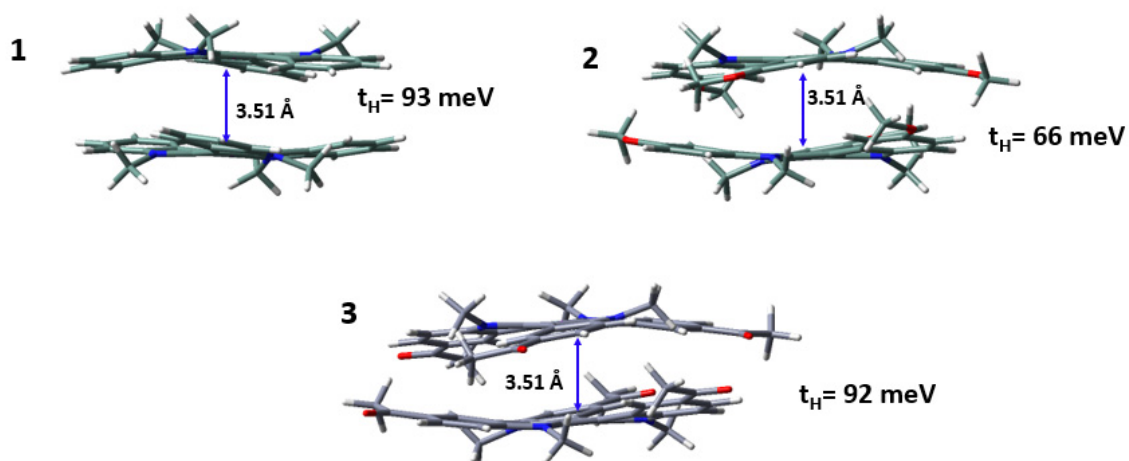

**Figure S11.** DFT-estimates of the transfer integrals (in meV) for holes for model cofacial dimers of **1-3** systems.

## 5. OFETs derived electrical data

**Table S2.** OFET derived electrical data for **1** vapor-deposited films under different conditions.

| Subst. treatment | Substrate temp. (°C) |             | $\mu_h$ (cm <sup>2</sup> V <sup>-1</sup> s <sup>-1</sup> ) | $I_{ON}/I_{OFF}$                  | $V_T$ (V)  |
|------------------|----------------------|-------------|------------------------------------------------------------|-----------------------------------|------------|
| OTS              | 60                   | Average     | $2.2 \times 10^{-2}$                                       | $1 \times 10^7$                   | -11        |
|                  |                      | <b>Best</b> | <b><math>2.8 \times 10^{-2}</math></b>                     | <b><math>3 \times 10^7</math></b> | <b>-17</b> |
|                  | 25                   | Average     | $2.0 \times 10^{-5}$                                       | $5 \times 10^3$                   | -3         |
|                  |                      | <b>Best</b> | <b><math>3.5 \times 10^{-5}</math></b>                     | <b><math>2 \times 10^4</math></b> | <b>0</b>   |
| HMDS             | 60                   | Average     | $3.2 \times 10^{-4}$                                       | $1 \times 10^5$                   | -11        |
|                  |                      | <b>Best</b> | <b><math>3.6 \times 10^{-4}</math></b>                     | <b><math>2 \times 10^5</math></b> | <b>-6</b>  |
|                  | 25                   | Average     | $1.2 \times 10^{-4}$                                       | $3 \times 10^4$                   | -14        |
|                  |                      | <b>Best</b> | <b><math>1.3 \times 10^{-4}</math></b>                     | <b><math>9 \times 10^4</math></b> | <b>-8</b>  |
| No treatment     | 60                   | Average     | $1.9 \times 10^{-5}$                                       | $3 \times 10^3$                   | 8          |
|                  |                      | <b>Best</b> | <b><math>2.8 \times 10^{-5}</math></b>                     | <b><math>1 \times 10^4</math></b> | <b>6</b>   |
|                  | 25                   | Average     | $5.9 \times 10^{-6}$                                       | $2 \times 10^2$                   | -2         |
|                  |                      | <b>Best</b> | <b><math>6.5 \times 10^{-6}</math></b>                     | <b><math>3 \times 10^2</math></b> | <b>0</b>   |

**Table S3.** OFET derived electrical data for **2** vapor-deposited films under different conditions.

| Subst. treatment | Substrate temp. (°C) |             | $\mu_h$ (cm <sup>2</sup> V <sup>-1</sup> s <sup>-1</sup> ) | $I_{ON}/I_{OFF}$                  | $V_T$ (V) |
|------------------|----------------------|-------------|------------------------------------------------------------|-----------------------------------|-----------|
| OTS              | 60                   | Average     | $2.2 \times 10^{-5}$                                       | $2 \times 10^2$                   | 3         |
|                  |                      | <b>Best</b> | <b><math>5.1 \times 10^{-5}</math></b>                     | <b><math>3 \times 10^2</math></b> | <b>3</b>  |
|                  | 25                   | Average     | $1.9 \times 10^{-4}$                                       | $9 \times 10^5$                   | -5        |
|                  |                      | <b>Best</b> | <b><math>2.0 \times 10^{-4}</math></b>                     | <b><math>2 \times 10^5</math></b> | <b>-5</b> |
|                  | 80                   | Average     | $9.3 \times 10^{-4}$                                       | $3 \times 10^3$                   | 13.1      |
|                  |                      | <b>Best</b> | <b><math>1.3 \times 10^{-3}</math></b>                     | <b><math>6 \times 10^3</math></b> | <b>-2</b> |
|                  | 90                   | Average     | $1.4 \times 10^{-3}$                                       | $6 \times 10^3$                   | -4        |
|                  |                      | <b>Best</b> | <b><math>1.6 \times 10^{-3}</math></b>                     | <b><math>1 \times 10^4</math></b> | <b>-8</b> |
| HMDS             | 60                   | Average     | $5.8 \times 10^{-6}$                                       | $6 \times 10^1$                   | -7        |
|                  |                      | <b>Best</b> | <b><math>6.6 \times 10^{-6}</math></b>                     | <b><math>2 \times 10^2</math></b> | <b>-5</b> |
|                  | 25                   | Average     | $8.2 \times 10^{-6}$                                       | $1 \times 10^2$                   | -10       |
|                  |                      | <b>Best</b> | <b><math>9.8 \times 10^{-6}</math></b>                     | <b><math>3 \times 10^2</math></b> | <b>-7</b> |
|                  | 80                   | Average     | $7.5 \times 10^{-6}$                                       | $1 \times 10^3$                   | 4         |
|                  |                      | <b>Best</b> | <b><math>8.3 \times 10^{-6}</math></b>                     | <b><math>6 \times 10^3</math></b> | <b>-8</b> |
| No treatment     | 60                   | Average     | $1.9 \times 10^{-5}$                                       | $3 \times 10^3$                   | 8         |
|                  |                      | <b>Best</b> | <b><math>2.8 \times 10^{-5}</math></b>                     | <b><math>1 \times 10^4</math></b> | <b>6</b>  |
|                  | 25                   | Average     | $5.9 \times 10^{-6}$                                       | $2 \times 10^2$                   | -2        |
|                  |                      | <b>Best</b> | <b><math>6.5 \times 10^{-6}</math></b>                     | <b><math>3 \times 10^2</math></b> | <b>0</b>  |
|                  | 80                   | Average     | $1.8 \times 10^{-6}$                                       | 9                                 | 20        |
|                  |                      | <b>Best</b> | <b><math>2.1 \times 10^{-6}</math></b>                     | <b><math>1 \times 10^1</math></b> | <b>10</b> |

**Table S4.** OFET derived electrical data for **3** vapor-deposited films under different conditions.

| Subst. treatment | Substrate temp. (°C)    |         | $\mu_h$ (cm <sup>2</sup> V <sup>-1</sup> s <sup>-1</sup> ) | $I_{ON}/I_{OFF}$ | $V_T$ (V) |
|------------------|-------------------------|---------|------------------------------------------------------------|------------------|-----------|
| OTS              | 25                      | Average | $1.0 \times 10^{-5}$                                       | $8 \times 10^1$  | -14       |
|                  |                         | Best    | $2.2 \times 10^{-5}$                                       | $2 \times 10^2$  | -29       |
|                  | 65                      | Average | $1.3 \times 10^{-5}$                                       | $9 \times 10^1$  | -12       |
|                  |                         | Best    | $1.7 \times 10^{-5}$                                       | $2 \times 10^2$  | -29       |
|                  | 120<br>(post annealing) | Average | $3.1 \times 10^{-5}$                                       | $2 \times 10^2$  | -17       |
|                  |                         | Best    | $4.5 \times 10^{-5}$                                       | $3 \times 10^2$  | -21       |
| HMDS             | 25                      | Average | $1.7 \times 10^{-5}$                                       | $4 \times 10^2$  | -18       |
|                  |                         | Best    | $2.2 \times 10^{-5}$                                       | $1 \times 10^3$  | -26       |
|                  | 65                      | Average | $1.5 \times 10^{-5}$                                       | $2 \times 10^2$  | -19       |
|                  |                         | Best    | $1.7 \times 10^{-5}$                                       | $2 \times 10^2$  | -12       |
|                  | 120<br>(post annealing) | Average | $1.8 \times 10^{-5}$                                       | $1 \times 10^2$  | -13       |
|                  |                         | Best    | $2.2 \times 10^{-5}$                                       | $2 \times 10^2$  | -23       |
| No. treatment    | 25                      | Average | $6.4 \times 10^{-6}$                                       | $6 \times 10^1$  | -8        |
|                  |                         | Best    | $9.9 \times 10^{-6}$                                       | $1 \times 10^2$  | -11       |
|                  | 65                      | Average | $6.5 \times 10^{-6}$                                       | $4 \times 10^1$  | -3        |
|                  |                         | Best    | $7.8 \times 10^{-6}$                                       | $7 \times 10^1$  | -5        |
|                  | 120<br>(post annealing) | Average | $1.0 \times 10^{-6}$                                       | $1 \times 10^1$  | 18        |
|                  |                         | Best    | $7.8 \times 10^{-6}$                                       | $2 \times 10^1$  | 7         |

## 6. Morphologic characterization

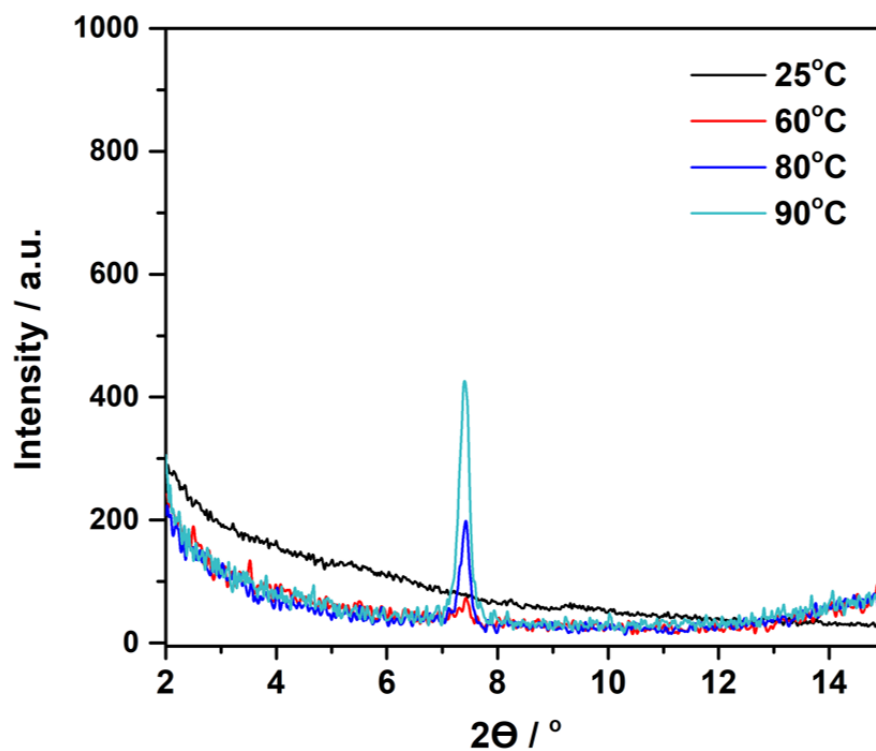

**Figure S12.** Experimental GIXRD spectra of triindole **2** deposited by slow sublimation under vacuum conditions on OTS treated Si/SiO<sub>2</sub> substrates preheated at different temperatures.

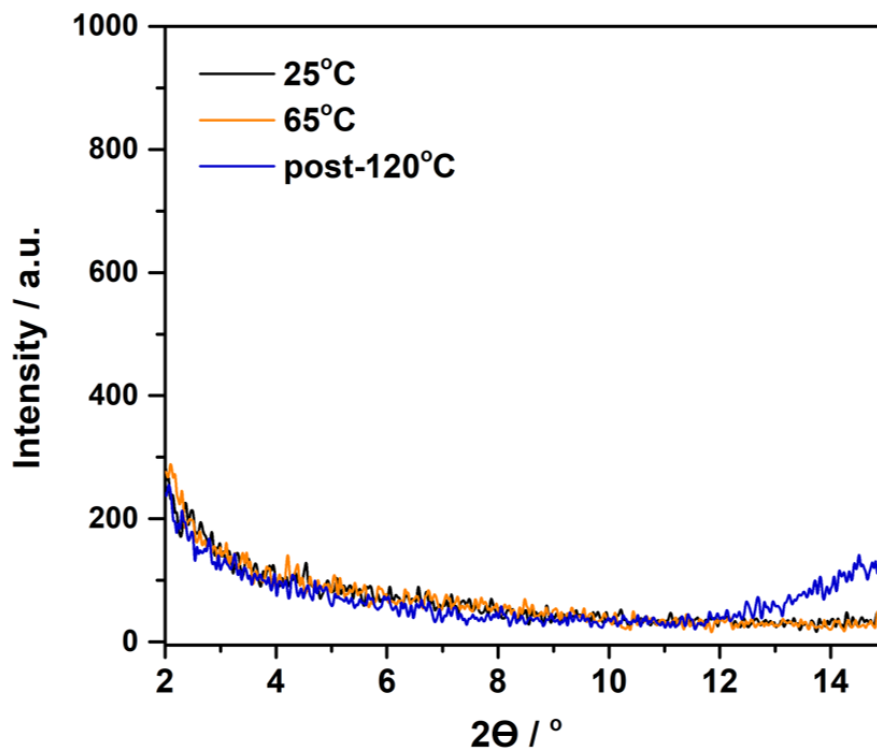

**Figure S13.** Experimental GIXRD spectra of triindole **3** deposited by slow sublimation under vacuum conditions on OTS treated Si/SiO<sub>2</sub> substrates preheated at different temperatures and with a post-annealing of 2 hours at 120°C (blue).

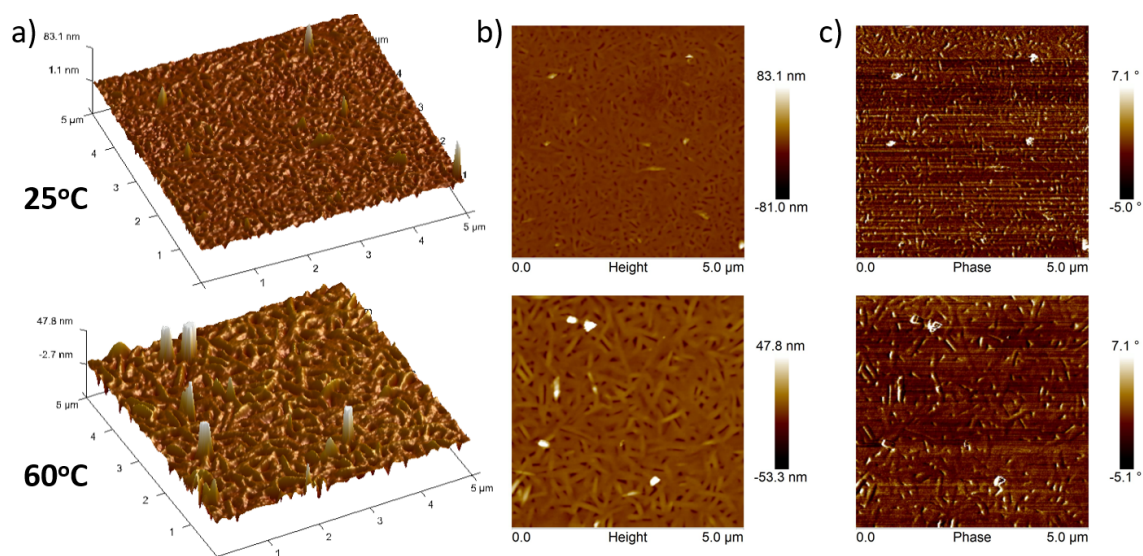

**Figure S14.** Tapping-mode AFM images of (a) 3D-topography, (b) height and (c) phase in 5 μm x 5 μm scan size of thin films of triindole **1** deposited on OTS-treated Si/SiO<sub>2</sub> substrates at different temperatures.

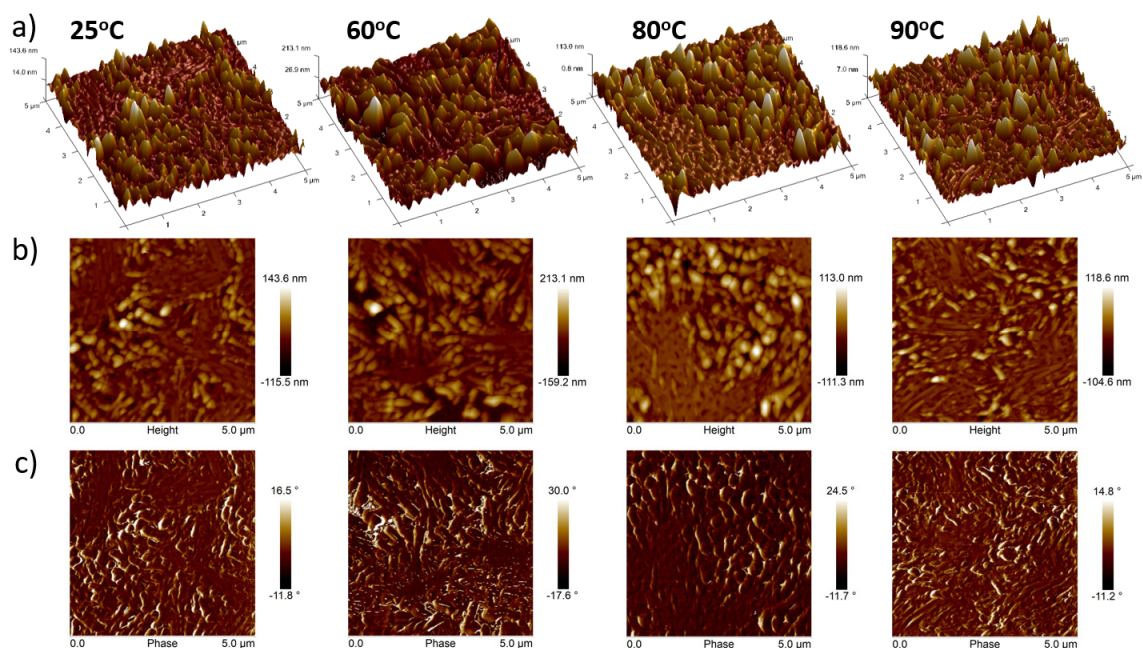

**Figure S15.** Tapping-mode AFM images of (a) 3D-topography, (b) height and (c) phase in 5 μm x 5 μm scan size of thin films of triindole **2** deposited on OTS-treated Si/SiO<sub>2</sub> substrates at different temperatures.



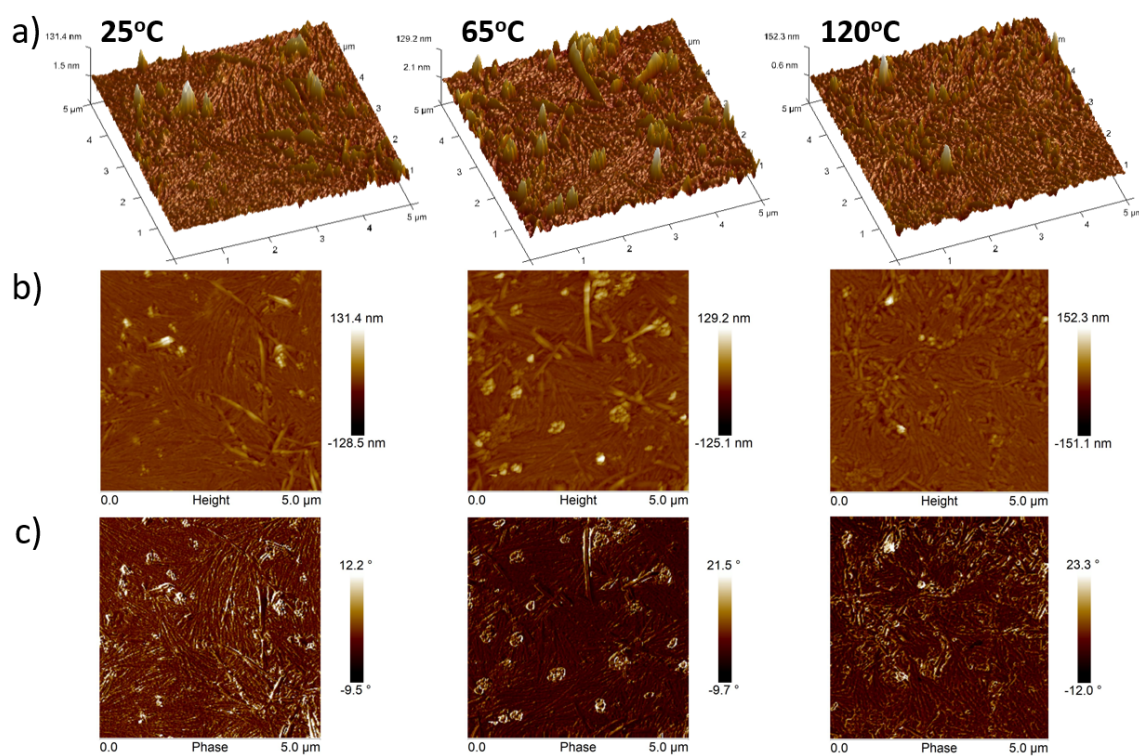

**Figure S16.** Tapping-mode AFM images of (a) 3D-topography, (b) height and (c) phase in 5 μm x 5 μm scan size of thin films of triindole **3** deposited on OTS-treated Si/SiO<sub>2</sub> substrates at different temperatures.
